# Supplementary material
Source: PubMed Central journal article supplement (PMC6047753)

Supplementary Figure S4

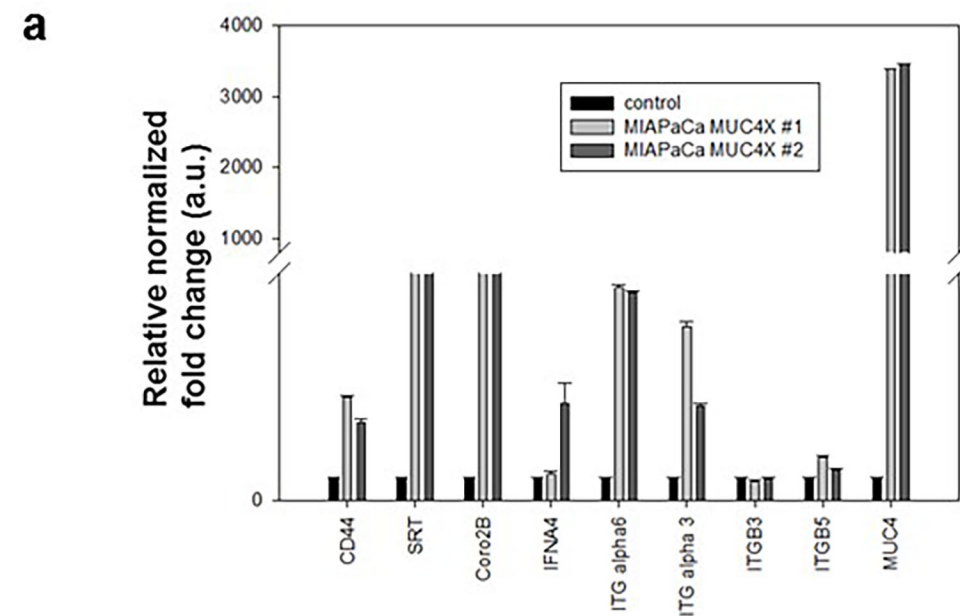

**b**

|             | Microarray Fold Change | QPCR -Fold Change |
|-------------|------------------------|-------------------|
| CD44        | 2.1                    | 3.4               |
| SRT         | 4.6                    | 11.8              |
| Coro2B      | 6.3                    | 51.0              |
| IFNA4       | 2.5                    | 4.3               |
| ITG alpha6  | 2.4                    | 9.2               |
| ITG alpha 3 | 3.1                    | 4.2               |
| ITGB3       | 1.2                    | 1.0               |
| ITGB5       | 1.2                    | 1.3               |
| hMUC4       | 45.9                   | 3460.3            |

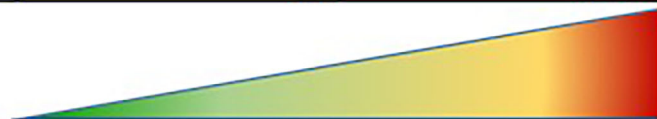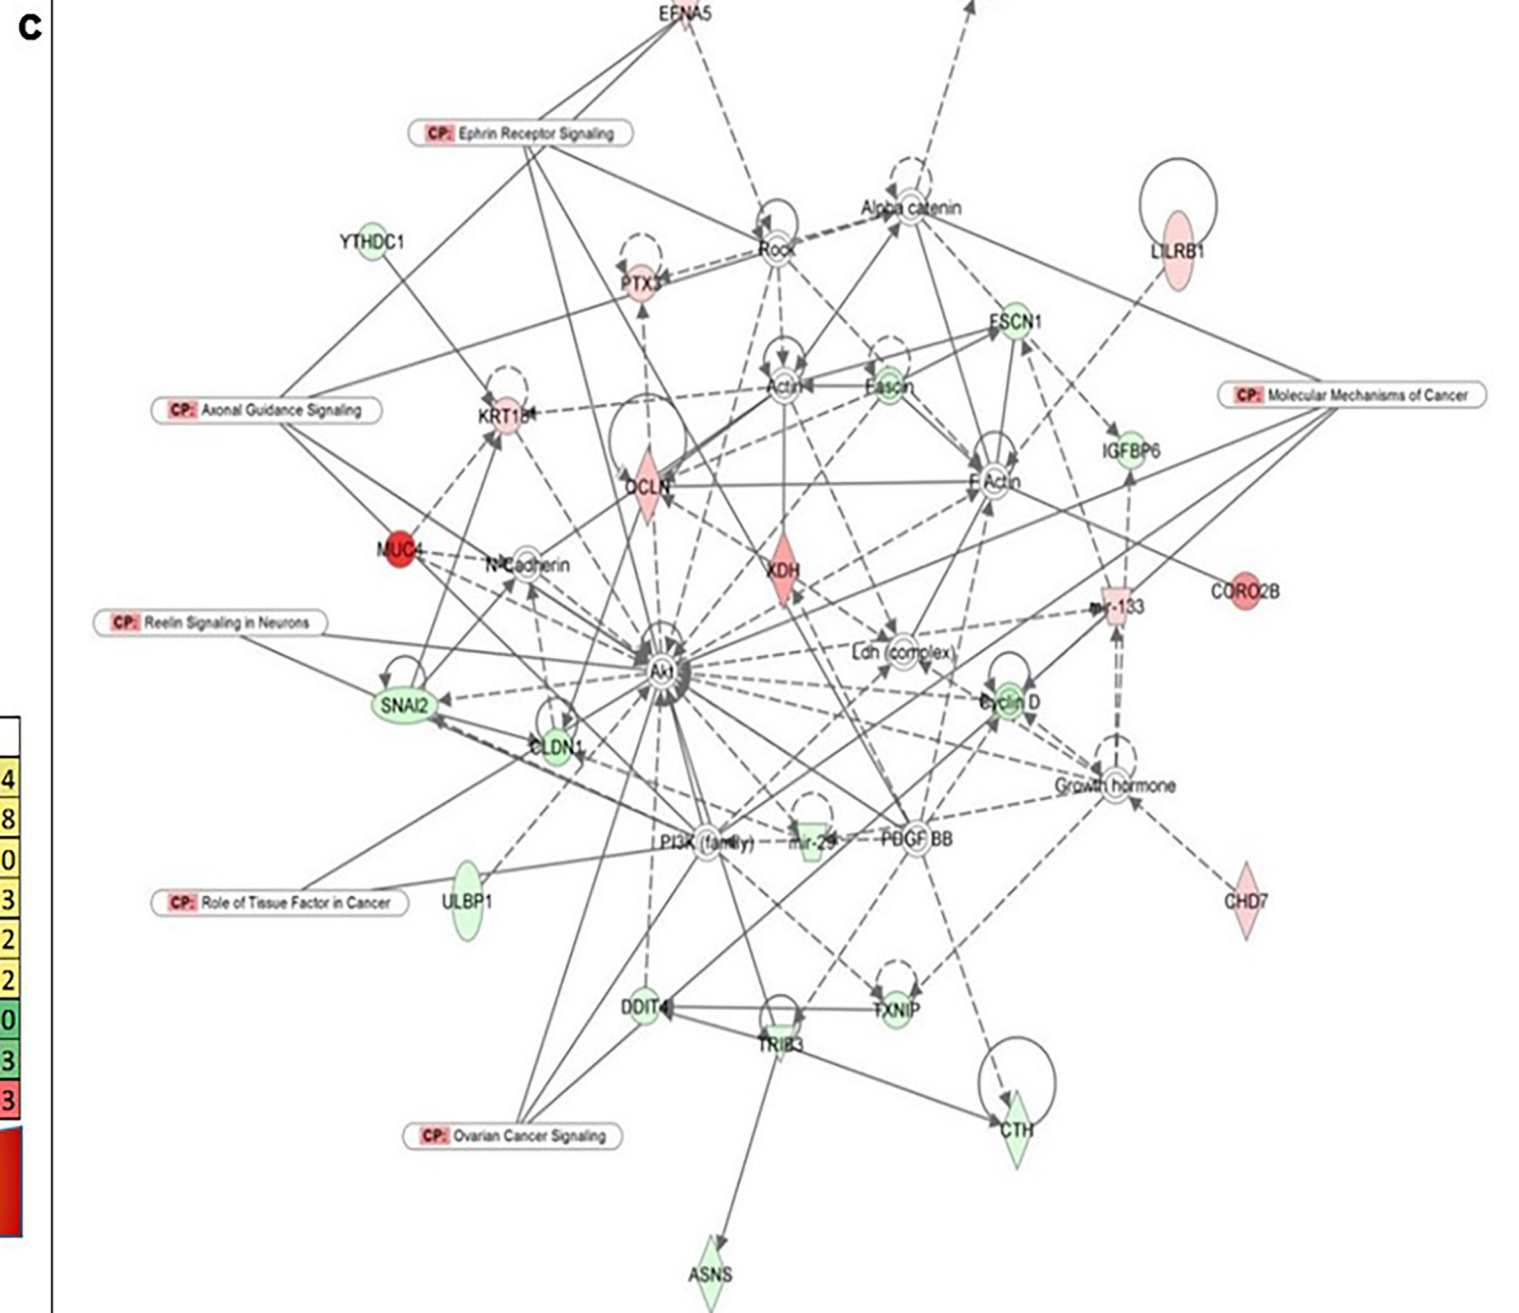

Supplement: NIHMS978239-supplement-FS4.pdf [file NIHMS978239-supplement-FS4.pdf]
