# Supplementary material
Source: PubMed Central journal article supplement (PMC6047753)
Supplement: NIHMS978239-supplement-TS1.pdf [file NIHMS978239-supplement-TS1.pdf]

**Supplementary Table S1 : qPCR primer list**

| <b>Gene Name</b>                | <b>Forward Primer</b>   | <b>Reverse Primer</b> |
|---------------------------------|-------------------------|-----------------------|
| <b>Sortilin 1</b>               | GGTGTCTGGAGGAAGTCGTG    | ACACCCACAGGCCATTTTCA  |
| <b>Coronin 2B</b>               | GGAACCTGGATGTGGGTGAG    | ATGGAGAGGTCCTCCTGGTC  |
| <b>Integrin B3</b>              | CATCCATAGCACCTCCACATAC  | CCAGCCAACTCATGGGAATAA |
| <b>INFA4</b>                    | ATGAGGACTCCATCCTGGCT    | CTGCTCTGACAACCTCCCAG  |
| <b>MUC4/X</b>                   | TGGTCCCAGGAGTTTCCCTCTT  | GGGAATCACGGAGAGAGGAGC |
| <b><math>\beta</math>-actin</b> | TGGACATCCGCAAAGACCTG    | CCGATCCACACGGAGTACTT  |
| <b>h-MUC4</b>                   | GACTTGGAGCTCTTTGAGAATGG | TGCAATGGCAGACCACAGTCC |
| <b>Exon 2-MUC4</b>              | ACAACCTCCACAGACTCCAC    | GAGACTGCTGAGGTCACTGG  |
| <b>Exon 3-MUC4</b>              | GAAGACAGACGGTGGGAGAC    | AGTGCTGGGAATGGTGGAAA  |
