# Supplementary material
Source: PubMed Central journal article supplement (PMC6047753)
Supplement: NIHMS978239-supplement-TS2.pdf [file NIHMS978239-supplement-TS2.pdf]

Supplementary Table S2: List of up- and downregulated genes observed MIAPaCa-MUC4/X as compared to MIAPaCa-EV

| Upregulated |              | Downregulated |           |
|-------------|--------------|---------------|-----------|
| Fold Change | Gene Name    | Fold Change   | Gene Name |
| 45.89       | MUC4         | -2.00         | FCGR1C    |
| 14.31       | LOC100507127 | -2.01         | KGFLP2    |
| 11.89       | TCN1         | -2.02         | VLDLR     |
| 7.93        | DNER         | -2.03         | RN5S125   |
| 7.21        | LOC100507412 | -2.03         | SEPW1     |
| 7.06        | LOC645949    | -2.04         | MIR29A    |
| 7.00        | RHOBTB3      | -2.04         | ALG10B    |
| 6.29        | ARHGAP29     | -2.04         | ETV1      |
| 6.28        | CORO2B       | -2.06         | MIR34A    |
| 5.09        | XDH          | -2.06         | MIR1269B  |
| 4.89        | C7orf69      | -2.06         | SEMA3C    |
| 4.58        | SORT1        | -2.07         | MIR4454   |
| 4.57        | SNORD115-11  | -2.07         | MIR548Y   |
| 4.57        | SNORD115-11  | -2.08         | FZD8      |
| 4.57        | SNORD115-11  | -2.08         | ANK2      |
| 4.57        | SNORD115-11  | -2.08         | ADAMTSL1  |
| 4.57        | SNORD115-22  | -2.09         | RN5S22    |
| 4.57        | SNORD115-11  | -2.10         | C6orf47   |
| 4.57        | SNORD115-11  | -2.10         | CDC14B    |
| 4.57        | SNORD115-11  | -2.10         | HIST1H4B  |
| 4.57        | SNORD115-42  | -2.10         | FAS       |
| 4.57        | SNORD115-42  | -2.11         | SNAR-D    |
| 4.11        | HMOX1        | -2.11         | MIR4755   |
| 4.09        | RNU7-62P     | -2.11         | CD109     |
| 4.01        | LOC100287723 | -2.11         | RN5S342   |
| 4.00        | SLC46A3      | -2.11         | RN5S342   |
| 3.62        | SNORD115-20  | -2.11         | RN5S342   |
| 3.62        | SNORD115-39  | -2.12         | DCLK2     |
| 3.59        | SHFM1        | -2.13         | DDIT4     |
| 3.54        | SNORD115-44  | -2.13         | FAM86HP   |
| 3.36        | OCLN         | -2.13         | BMPR1B    |
| 3.35        | HLA-DPB1     | -2.15         | RFC1      |
| 3.28        | HKDC1        | -2.15         | LOC729974 |
| 3.19        | RBMS3        | -2.15         | RNU7-27P  |
| 3.16        | RNU7-34P     | -2.16         | RAET1K    |

|      |             |       |              |
|------|-------------|-------|--------------|
| 3.09 | GRAMD3      | -2.17 | EFNB2        |
| 3.06 | ITGA3       | -2.17 | RGS5         |
| 3.04 | SPANXD      | -2.18 | MIR516A2     |
| 3.03 | SNORD115-30 | -2.18 | HLA-DQB1-AS1 |
| 2.93 | RN5S382     | -2.18 | LOC100506670 |
| 2.92 | PRKAA2      | -2.19 | YTHDC1       |
| 2.89 | KCNK5       | -2.19 | ZNF383       |
| 2.67 | LAMB3       | -2.19 | PRDM1        |
| 2.66 | LOC647859   | -2.19 | VEGFA        |
| 2.65 | CAMK1G      | -2.19 | TXNIP        |
| 2.64 | MIR4495     | -2.20 | ABL2         |
| 2.57 | GAS1        | -2.20 | RN5S152      |
| 2.54 | CHD7        | -2.20 | MAML2        |
| 2.54 | RN5S117     | -2.20 | MIR374A      |
| 2.53 | GJB5        | -2.20 | TLR6         |
| 2.53 | SH3RF2      | -2.21 | IGFBP6       |
| 2.51 | MIR4307     | -2.21 | RN5S143      |
| 2.48 | KRTAP4-2    | -2.21 | LOC100505951 |
| 2.48 | CACHD1      | -2.21 | FYN          |
| 2.47 | IFNA4       | -2.22 | RN5S76       |
| 2.47 | KRTAP21-1   | -2.22 | CSF3         |
| 2.46 | MIR4804     | -2.22 | UST          |
| 2.42 | MIR622      | -2.24 | LOC653712    |
| 2.40 | LOC441242   | -2.25 | RN5S241      |
| 2.39 | KRT18       | -2.26 | NTSR1        |
| 2.38 | KRT18P10    | -2.28 | FAM171B      |
| 2.37 | HSPA4L      | -2.30 | ATF7         |
| 2.37 | ITGA6       | -2.31 | HIST1H3H     |
| 2.35 | ATP1B1      | -2.33 | MIR548AA1    |
| 2.34 | CDH10       | -2.35 | TRIB3        |
| 2.34 | ANKRD30BP2  | -2.38 | ULBP1        |
| 2.34 | SLC43A2     | -2.39 | KLF12        |
| 2.33 | RNY3P7      | -2.41 | SNAR-B1      |
| 2.32 | LOC283174   | -2.41 | SNAR-B1      |
| 2.32 | ABCA3       | -2.41 | CTH          |
| 2.31 | ZNF165      | -2.43 | KRTAP19-7    |
| 2.31 | PDE10A      | -2.43 | FKBPL        |
| 2.31 | RN5S476     | -2.43 | HIST1H2AH    |
| 2.30 | SNORD115-1  | -2.44 | MIR3975      |
| 2.30 | SNORD115-1  | -2.47 | ASNS         |
| 2.29 | TSPAN33     | -2.48 | AGA          |

|      |             |       |                       |
|------|-------------|-------|-----------------------|
| 2.28 | RN5S361     | -2.49 | GRM6                  |
| 2.28 | RN5S381     | -2.49 | MIR548V               |
| 2.27 | CLC         | -2.50 | LHFP                  |
| 2.27 | SEC62-AS1   | -2.50 | KLHDC5                |
| 2.27 | SNAP25      | -2.51 | SEL1L3                |
| 2.26 | RNU7-89P    | -2.52 | NFIA                  |
| 2.24 | SQRDL       | -2.55 | RN5S160               |
| 2.24 | SNORD115-34 | -2.55 | CDK6                  |
| 2.23 | LILRB1      | -2.56 | CHAC1                 |
| 2.22 | NUP210      | -2.56 | HOXB5                 |
| 2.22 | ZDHHC8P1    | -2.57 | RN5S348               |
| 2.22 | RN5S128     | -2.58 | RN5S141               |
| 2.21 | PTX3        | -2.58 | ZNF618                |
| 2.21 | RN5S484     | -2.59 | ZNF827                |
| 2.20 | HIST1H3F    | -2.59 | CACNG7                |
| 2.17 | RN5S51      | -2.60 | PRLR                  |
| 2.17 | CD40        | -2.62 | TRIM59                |
| 2.17 | MIR133A1    | -2.66 | FAT1                  |
| 2.16 | LOC644634   | -2.72 | ARHGAP18              |
| 2.15 | AKR1C2      | -2.75 | RNU7-24P              |
| 2.15 | RNU7-57P    | -2.77 | FAM129A               |
| 2.14 | TANC2       | -2.79 | LINC00312             |
| 2.14 | LGALS3BP    | -2.80 | RN5S64                |
| 2.14 | OR8D4       | -2.82 | GRIK1-AS2 //<br>BACH1 |
| 2.13 | TDRKH       | -2.83 | RN5S489               |
| 2.12 | HSD3B7      | -2.83 | PHGDH                 |
| 2.12 | EFNA5       | -2.83 | GNAQ                  |
| 2.12 | MIR4779     | -2.84 | C10orf32-AS3MT        |
| 2.12 | RNU7-58P    | -2.85 | FSCN1                 |
| 2.11 | C10orf116   | -2.86 | SNAR-C1               |
| 2.11 | LPPR3       | -2.86 | SNAR-C1               |
| 2.10 | CD44        | -2.89 | PDLIM5                |
| 2.10 | E2F5        | -2.97 | GNG11                 |
| 2.09 | MIR938      | -2.97 | RPS6KA6               |
| 2.09 | TRAJ36      | -3.14 | SNAR-B1               |
| 2.09 | LPAR3       | -3.37 | SNAI2                 |
| 2.08 | SERPINF1    | -3.43 | EHF                   |
| 2.07 | SYDE2       | -3.45 | MCTP1                 |
| 2.07 | RN5S321     | -3.57 | GPR1                  |
| 2.07 | KRT18       | -3.66 | ARNTL2                |
| 2.07 | ZNF471      | -3.75 | ZNF804A               |

|      |                              |        |          |
|------|------------------------------|--------|----------|
| 2.06 | SLC6A12                      | -3.78  | RNU6-14  |
| 2.05 | RN5S43                       | -3.91  | CCND2    |
| 2.05 | RN5S301                      | -3.99  | MYH15    |
| 2.05 | MIR4436A                     | -4.05  | LY96     |
| 2.05 | MIR516A1                     | -4.41  | CLDN1    |
| 2.04 | OR51F2                       | -4.58  | FRRS1    |
| 2.04 | UCA1                         | -4.79  | CYP4V2   |
| 2.04 | MIR548T                      | -5.43  | FGD6     |
| 2.04 | KRT18P54                     | -5.52  | HCN1     |
| 2.03 | LOC100289038                 | -5.83  | TRIML2   |
| 2.03 | KLHL24                       | -6.07  | DNAJA4   |
| 2.03 | AGPAT9                       | -7.27  | TPD52L1  |
| 2.03 | GINS4                        | -7.33  | STC1     |
| 2.03 | GAGE1                        | -7.37  | C1orf110 |
| 2.02 | ATP8B1                       | -7.57  | EPGN     |
| 2.02 | FZD2                         | -7.83  | ALDH1L2  |
| 2.02 | TRAJ7                        | -8.58  | BCHE     |
| 2.02 | MIR4778                      | -8.96  | ELOVL2   |
| 2.01 | TSPAN18                      | -8.99  | BCAT1    |
| 2.01 | DPYD-IT1                     | -9.81  | TMEM156  |
| 2.00 | CD68                         | -14.79 | RGS4     |
| 2.00 | LOC100507607 //<br>LOC728734 | -15.36 | VEGFC    |
|      |                              | -17.05 | PTPRZ1   |
|      |                              | -21.32 | SLC7A11  |
