# Supplementary material
Source: PubMed Central journal article supplement (PMC6047753)

(a)

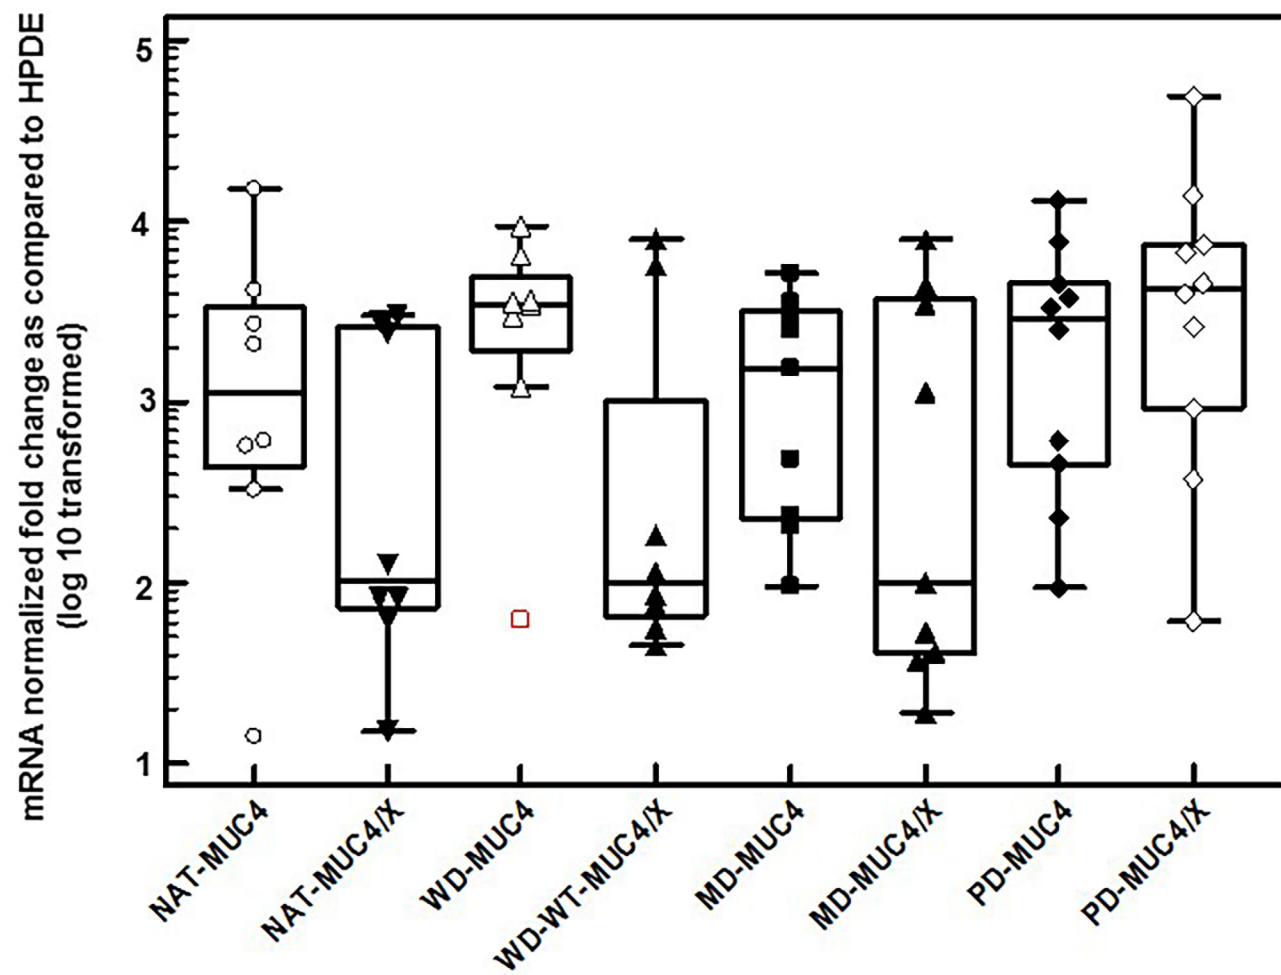

(b)

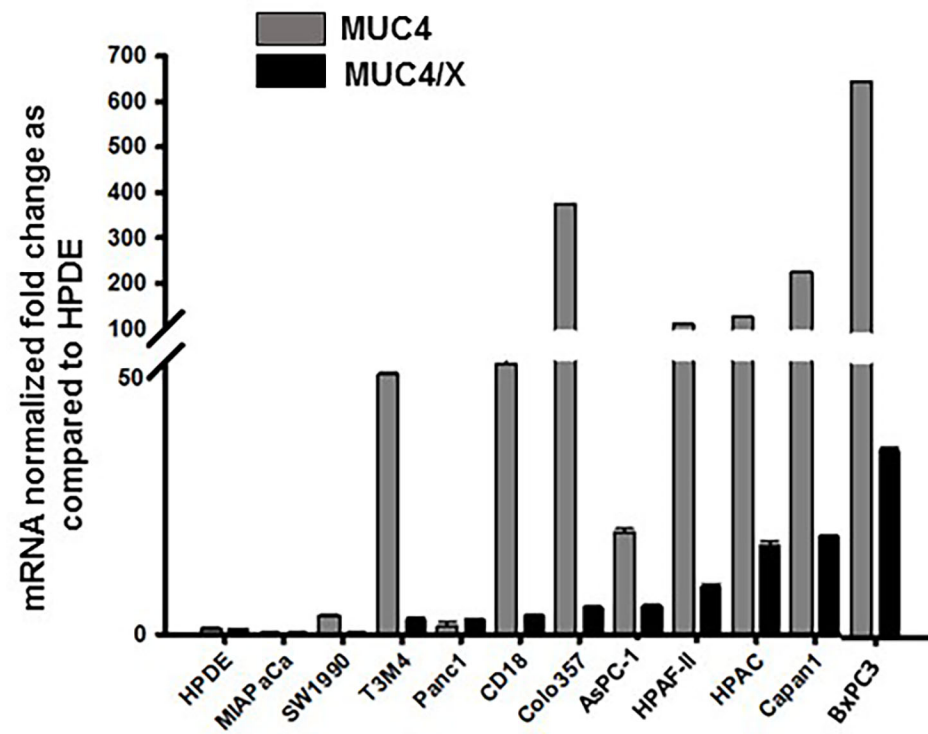

Supplement: NIHMS978239-supplement-FS1.pdf [file NIHMS978239-supplement-FS1.pdf]

# Supplementary Figure S2

(a)

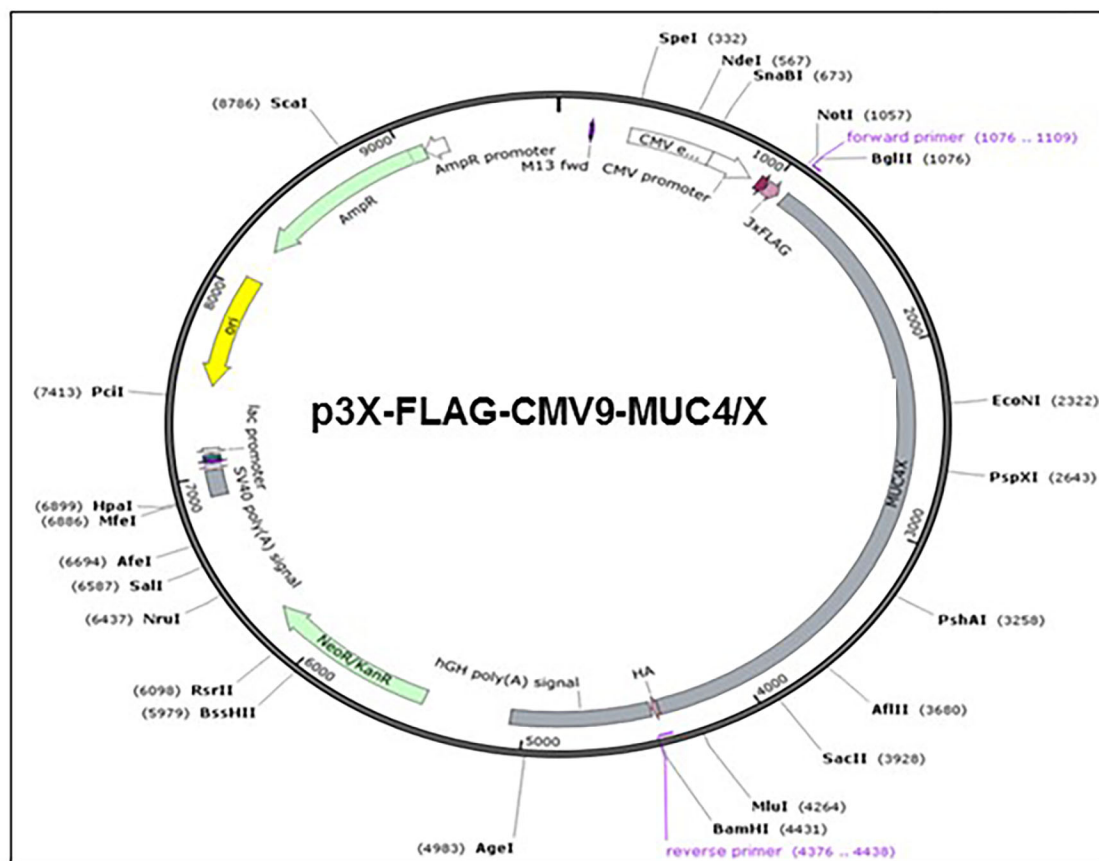

(b)

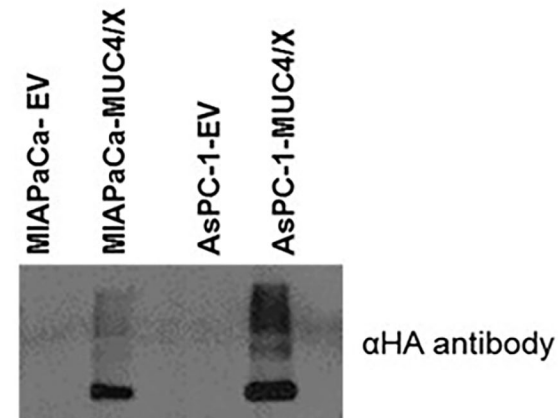

(c)

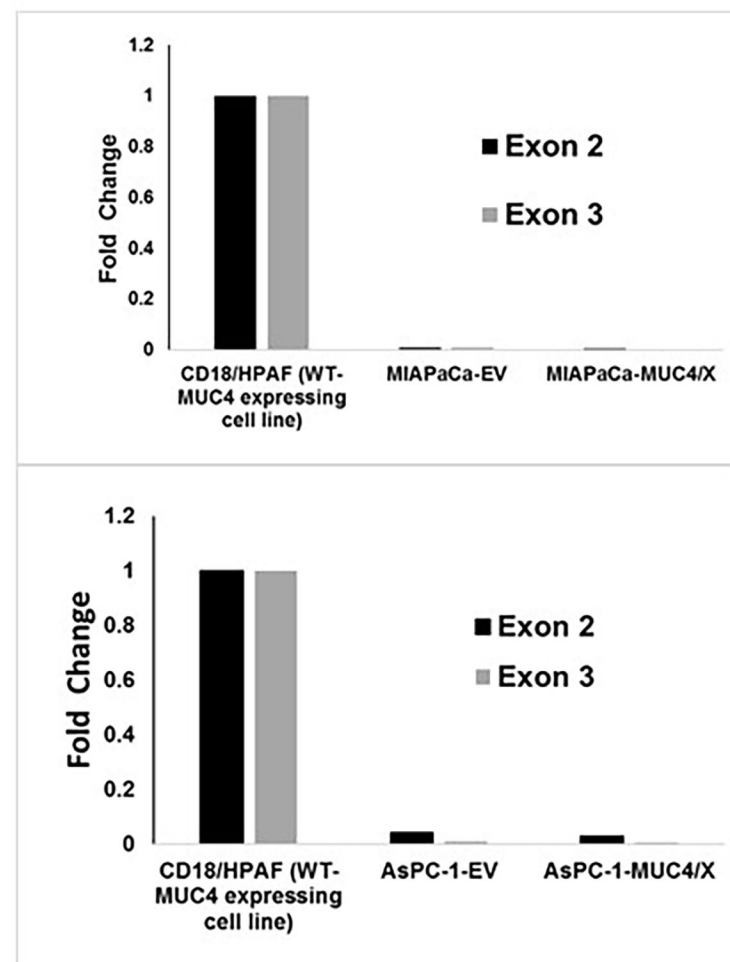

Supplement: NIHMS978239-supplement-FS2.pdf [file NIHMS978239-supplement-FS2.pdf]

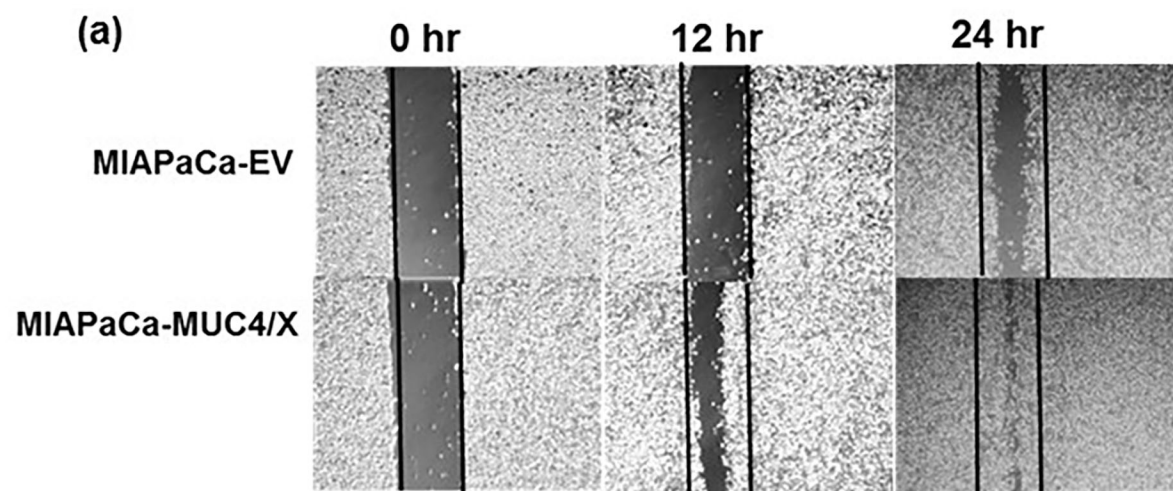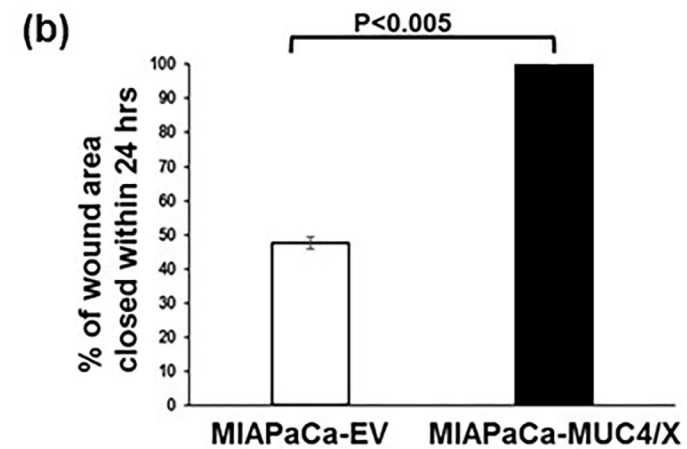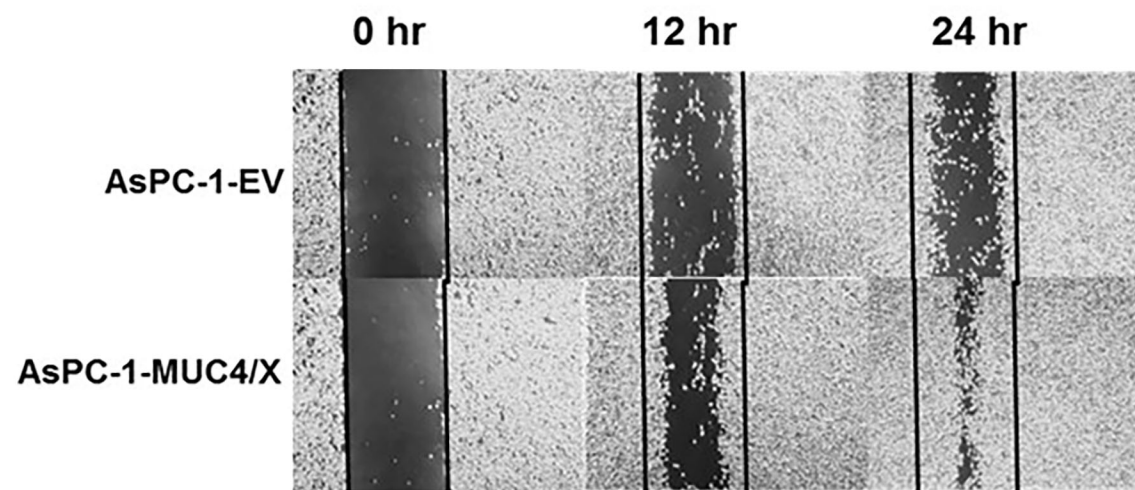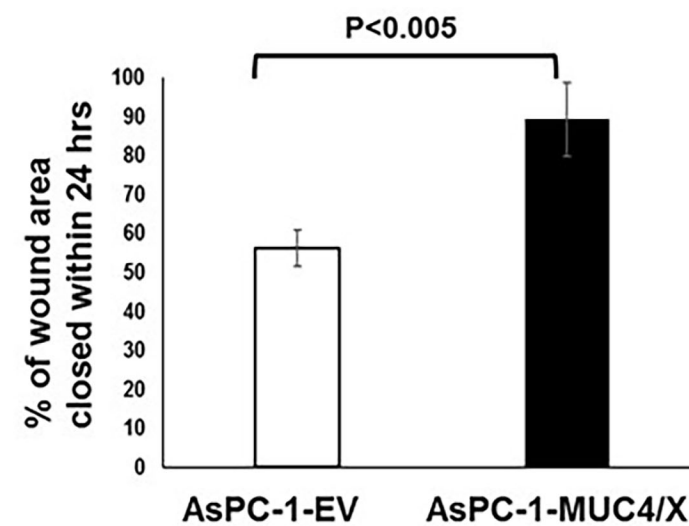

Supplement: NIHMS978239-supplement-FS3.pdf [file NIHMS978239-supplement-FS3.pdf]

Supplementary Figure S5

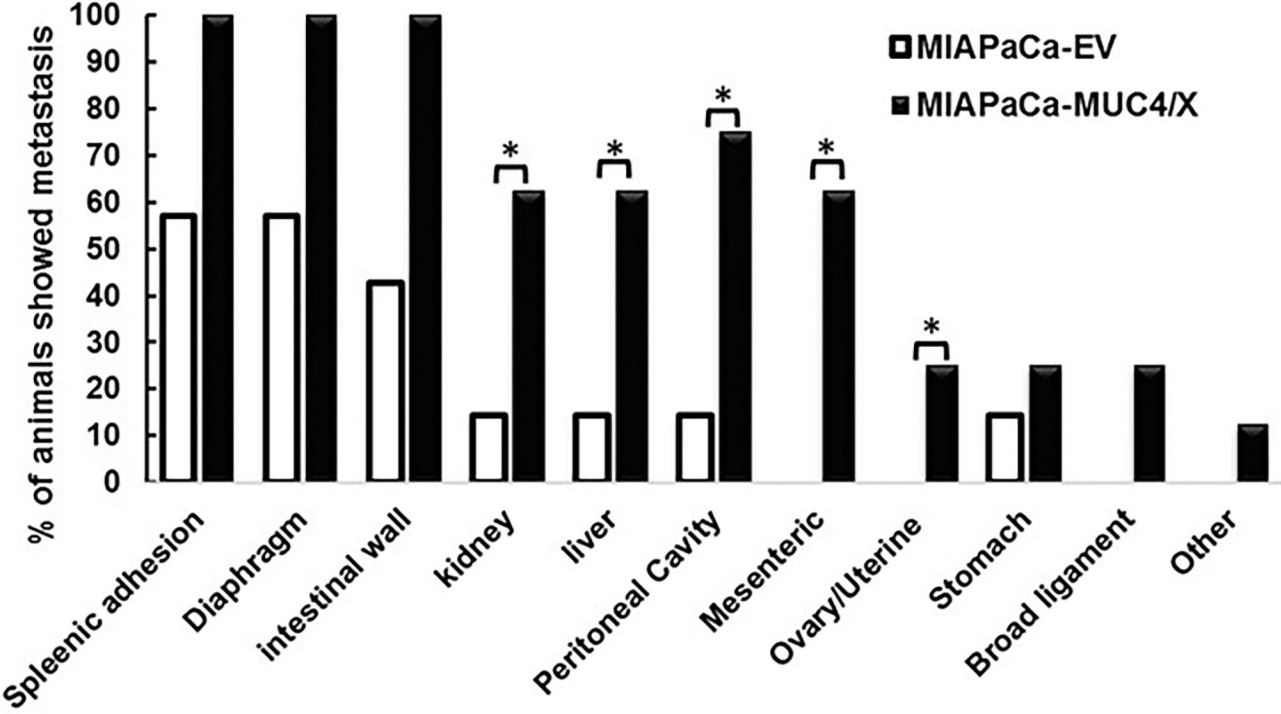

Supplement: NIHMS978239-supplement-FS5.pdf [file NIHMS978239-supplement-FS5.pdf]
